# Supplementary material
Source: Research Square preprint supplement (doi:10.21203/rs.3.rs-8860812/v1)
Supplement: Supplementary file 1 [file 31faf9e72c3f9cbea81244c3.docx]

**Declaration of interests**
 
☒ The authors declare that they have no known competing financial interests or personal relationships that could have appeared to influence the work reported in this paper.
 
☐ The authors declare the following financial interests/personal relationships which may be considered as potential competing interests:

 
 
 
